# Supplementary material for: Biomass-derived 3D hierarchical Zr-based tubular magnetomotors with peroxidase-like properties for selective colorimetric detection and specific decontamination of glyphosate at neutral pH
Source: Royal Society of Chemistry journal article supplement (doi:10.1039/d3en00167a), 2023-01-01
Supplement: d3en00167a1.pdf [file d3en00167a1.pdf]

## Supporting Information

# Biomass-derived 3D hierarchical Zr-based tubular magnetomotors with peroxidase-like property for selective colorimetric detection and specific decontamination of glyphosate at neutral pH

Wenning Yang<sup>a,b</sup>, Yangsai Lyu<sup>c</sup>, Ziwei Lan<sup>b</sup>, Jia Li<sup>b,l</sup>, Dickon H.L. Ng<sup>d</sup>

<sup>a</sup>Shandong Provincial Key Laboratory of Chemical Energy Storage and Novel Cell Technology, School of Chemistry and Chemical Engineering, Liaocheng University, Liaocheng 252000, P. R. China

<sup>b</sup>School of Material Science and Engineering, University of Jinan, Jinan 250022, P. R. China

<sup>c</sup>Department of Mathematics and Statistics, Queen's University, Kingston, K7L 3N6, Canada

<sup>d</sup>School of Science and Engineering, The Chinese University of Hong Kong (Shenzhen), Shenzhen, P. R. China.

**This file includes Videos S1-S4 and Fig. S1-S5.**

**Video S1.** Motion of ZrO<sub>2</sub>/MnFe<sub>2</sub>O<sub>4</sub>/FeZr-MOF micromotors in 3 wt.% H<sub>2</sub>O<sub>2</sub> and 0.5 wt.% SDS.

**Video S2.** Motion of ZrO<sub>2</sub>/MnFe<sub>2</sub>O<sub>4</sub>/FeZr-MOF micromotors in 5 wt.% H<sub>2</sub>O<sub>2</sub> and 0.5 wt.% SDS.

**Video S3.** Motion of ZrO<sub>2</sub>/MnFe<sub>2</sub>O<sub>4</sub>/FeZr-MOF micromotors in 10 wt.% H<sub>2</sub>O<sub>2</sub> and 0.5 wt.% SDS.

**Video S4.** Magnetic guide motion of micromotors in 3 wt.% H<sub>2</sub>O<sub>2</sub> and 0.5 wt.% SDS.

**Fig. S1.** XPS spectra of ZrO<sub>2</sub>/MnFe<sub>2</sub>O<sub>4</sub>/FeZr-MOF micromotors: survey spectrum (a) and high-resolution spectrum of Fe 2p (b), Mn 2p (c), Zr 3d (d), C 1s (e) and O 1s (f).

**Fig. S2.** The effect of H<sub>2</sub>O<sub>2</sub> concentration on the amount of generated O<sub>2</sub> (a), and the effect of different catalysts on the amount of generated O<sub>2</sub> (b).

**Fig. S3.** UV-Vis spectra for the oxidation of three substrates catalyzed by ZrO<sub>2</sub>/MnFe<sub>2</sub>O<sub>4</sub>/FeZr-MOF without H<sub>2</sub>O<sub>2</sub> (a), EPR spectrum of DMPO-O<sub>2</sub>• in air saturated solution (b), and the fluorescence spectra of different samples in a basic solution of TA (c).

**Fig. S4.** Influence of the micromotors concentration (a), TMB concentration (b), H<sub>2</sub>O<sub>2</sub> concentration (c), pH value (d), temperature (e), and incubation time (f) on the oxidation of TMB by ZrO<sub>2</sub>/MnFe<sub>2</sub>O<sub>4</sub>/FeZr-MOF micromotors.

**Fig. S5.** Steady-state kinetic assay (a, c) and the corresponding double reciprocal plots (b, d) of ZrO<sub>2</sub>/MnFe<sub>2</sub>O<sub>4</sub>/FeZr-MOF micromotors.

**Fig. S6.** The absorbance variation of oxTMB at 652 nm for the mixture solution of glyphosate and interfering pesticides.

**Fig. S7.** The liner fitting curves of ZrO<sub>2</sub>/MnFe<sub>2</sub>O<sub>4</sub>/FeZr-MOF micromotors and non-motors based on pseudo-first-order kinetic model (a) and pseudo-second-order kinetic model (b).

**Fig. S8.** The liner fitting charts of ZrO<sub>2</sub>/MnFe<sub>2</sub>O<sub>4</sub>/FeZr-MOF micromotors and non-motors according to Langmuir adsorption isotherm model (a,b) and Freundlich model (c,d).

**Table S1.** Motion parameters of ZrO<sub>2</sub>/MnFe<sub>2</sub>O<sub>4</sub>/FeZr-MOF in different concentrations of H<sub>2</sub>O<sub>2</sub>.

**Table S2.** Comparison of  $K_m$  and  $V_{max}$  of ZrO<sub>2</sub>/MnFe<sub>2</sub>O<sub>4</sub>/FeZr-MOF with other reported materials.

---

<sup>l</sup>Corresponding authors at: School of Material Science and Engineering, University of Jinan, Jinan, 250022, China.  
E-mail address: mse\_lij@ujn.edu.cn (Jia Li).

## Materials

ZrOCl<sub>2</sub>·8H<sub>2</sub>O, FeCl<sub>3</sub>·6H<sub>2</sub>O, Fe(NO<sub>3</sub>)<sub>3</sub>·9H<sub>2</sub>O, 1,4-BDC-NH<sub>2</sub>, dimethylformamide (DMF), NaOH, ethylene glycol (EG), acetic acid (HAc), terephthalic acid (TA), glyphosate, sodium dodecyl sulfonate (SDS, C<sub>12</sub>H<sub>25</sub>SO<sub>3</sub>Na), and H<sub>2</sub>O<sub>2</sub> (30 wt.%) were purchased from Sinopharm Chemical Reagent Co., Ltd (Shanghai, China). MnCl<sub>2</sub>·4H<sub>2</sub>O, Zr(NO<sub>3</sub>)<sub>4</sub>·5H<sub>2</sub>O were acquired from Shanghai Macklin Biochemical Co., Ltd (Shanghai, China). Isopropanol (IPA), NaN<sub>3</sub>, *p*-benzoquinone (BQ), 3,3',5,5'-tetramethylbenzidine (TMB), *o*-phenylenediamine (OPD), and 2,2'-azino-bis (3-ethylbenzothiazoline-6-sulfonic acid (ABTS) were supplied by Aladdin Reagent Co., Ltd. (Shanghai, China). *Cynanchum* seed hair was collected in the wild.

## Characterizations

The microstructures of the as-prepared samples was characterized by field emission scanning electron microscopy (FESEM, FEI QUANTA FEG250, USA) and transmission electron microscopy (TEM, JEO-1400, Japan). The elemental composition of samples was identified by energy dispersive X-ray spectroscopy (EDS). The crystal structure of samples was evaluated using X-ray diffraction (XRD) with Cu K $\alpha$  radiation in the  $2\theta$  range of 5° to 80° at a scan speed of 10°·min<sup>-1</sup>. Fourier transform infrared (FT-IR) spectra of the prepared samples were tested by a Nicolet 670 FT-IR spectrometer (ThomasNicolet, USA). N<sub>2</sub> adsorption/desorption isotherms were measured by a MFA-140 Brunauer-Emmett-Teller (BET) surface analyzer. The fluorescence spectra were determined by an F-7000 fluorescence spectrophotometer (HITACHI, Japan) under the condition of a xenon lamp excitation light source and Ultraviolet-Visible (UV-Vis) absorbance spectra were collected by a UV-3600 plus spectrophotometer (Shimadzu, Japan). Motion videos of micromotors were captured by an optical microscope model (Microscope N-300M, China) with a DC2000 digital camera.

## Experiments

The standard curve of the colorimetric measurements was established according to Equ.S1:

$$\Delta A = A_0 - A \quad (S1)$$

where  $\Delta A$  is the absorbance variation of oxTMB at 652 nm,  $A_0$  and  $A$  stand for the absorbance values without and with glyphosate, respectively.

The adsorbed mass per unit mass  $q_t$  ( $\text{mg}\cdot\text{g}^{-1}$ ) at the adsorption time  $t$  (min) was calculated according to the following equation:

$$q_t = \frac{(C_0 - C_t)V}{m} \quad (\text{S2})$$

where  $C_0$  ( $\text{mg}\cdot\text{L}^{-1}$ ) is the initial glyphosate concentration;  $C_t$  ( $\text{mg}\cdot\text{L}^{-1}$ ) is the glyphosate concentration at time  $t$  (min);  $V$  (L) is the volume of the solution, and  $m$  (g) is the mass of the micromotors.

The Michaelis-Menten constant was calculated using a Lineweaver-Burk plot (Equ. S3) (Yang et al., 2019):

$$\frac{1}{v} = \left( \frac{K_m}{V_{\max}} \right) \left( \frac{1}{[S]} \right) + \left( \frac{1}{V_{\max}} \right) \quad (\text{S3})$$

where  $V$  is the initial reaction velocity,  $V_m$  is the maximal reaction velocity,  $[S]$  represents the substrate concentration, and  $K_m$  is the Michaelis-Menten constant, which is an indicator of catalyst affinity for its substrate. The smaller the value of  $K_m$ , the stronger the affinity between the enzyme and the substrate.

The pseudo-first-order kinetic model was drawn as Equ. S4 (Dong et al., 2019):

$$\ln(q_e - q_t) = \ln q_e - K_1 t \quad (\text{S4})$$

where  $q_e$  and  $q_t$  ( $\text{mg}\cdot\text{g}^{-1}$ ) are the adsorption capacity ( $\text{mg}\cdot\text{g}^{-1}$ ) at equilibrium and at any time  $t$  (h), respectively, and  $K_1$  ( $\text{h}^{-1}$ ) is the adsorption rate constant of pseudo-first-order equation. The pseudo-second-order was expressed by the following equation Equ. S5 (Dong et al., 2019):

$$\frac{t}{q_t} = \frac{1}{K_2 q_e^2} + \frac{1}{q_e} t \quad (\text{S5})$$

where  $K_2$  is the rate constant of the pseudo-second-order model.

The Langmuir isotherm equation was expressed as Equ. S6 (Xun et al., 2015):

$$\frac{C_e}{q_e} = \frac{1}{q_{\max} K_L} + \frac{C_e}{q_{\max}} \quad (\text{S6})$$

where  $C_e$  ( $\text{mg}\cdot\text{L}^{-1}$ ) is the equilibrium concentration, and  $q_e$  ( $\text{mg}\cdot\text{g}^{-1}$ ) is the equilibrium adsorption capacity,  $q_{\max}$  ( $\text{mg}\cdot\text{g}^{-1}$ ) refers to maximum adsorption capacity.  $K_L$  represents the

Langmuir constant. The Freundlich isotherm was given by Equ. S7 (Xun et al., 2015):

$$\ln q_e = \ln K_F + \frac{1}{n} \ln C_e \quad (\text{S7})$$

where  $K_F$  and  $n$  are Freundlich constants related to adsorption capacity and adsorption intensity, respectively.

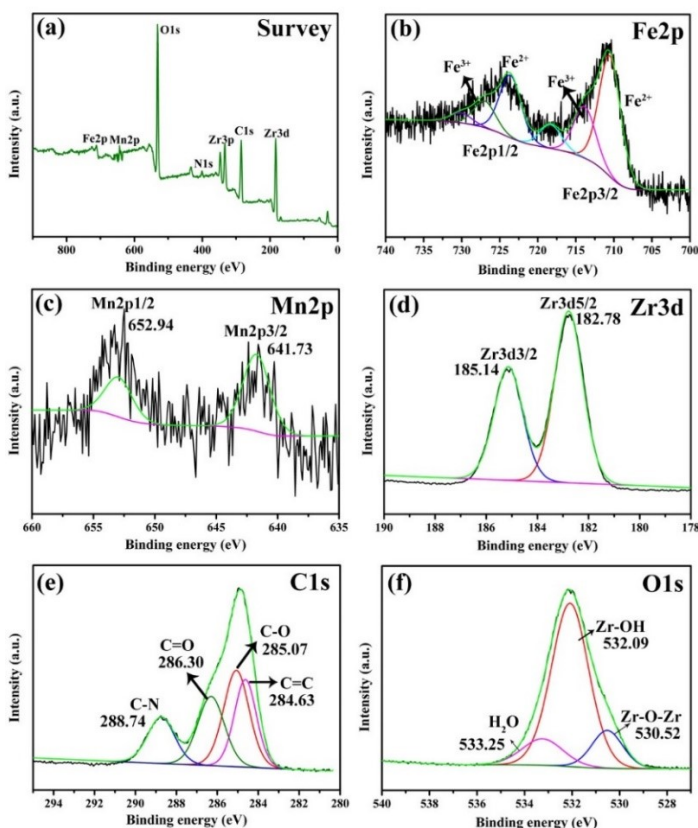

**Fig. S1.** XPS spectra of  $\text{ZrO}_2/\text{MnFe}_2\text{O}_4/\text{FeZr-MOF}$  micromotors: survey spectrum (a), and high-resolution spectrum of Fe 2p (b), Mn 2p (c), Zr 3d (d), C 1s (e), and O 1s (f).

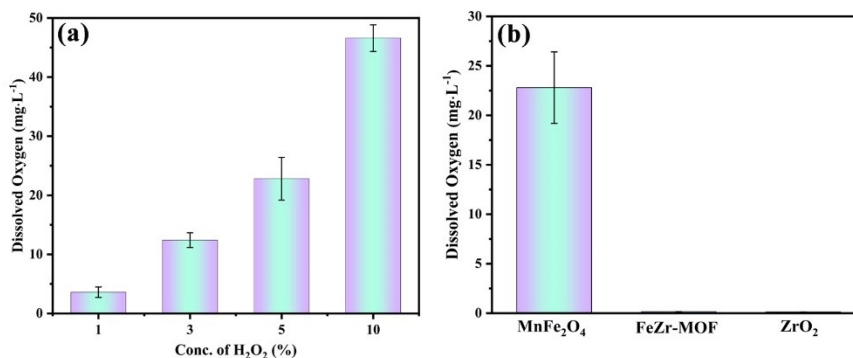

**Fig. S2.** The effect of  $\text{H}_2\text{O}_2$  concentration on the amount of generated  $\text{O}_2$  (a), and the effect of different catalysts on the amount of generated  $\text{O}_2$  (b). Error bars represent the standard deviations of three replicate measurements.

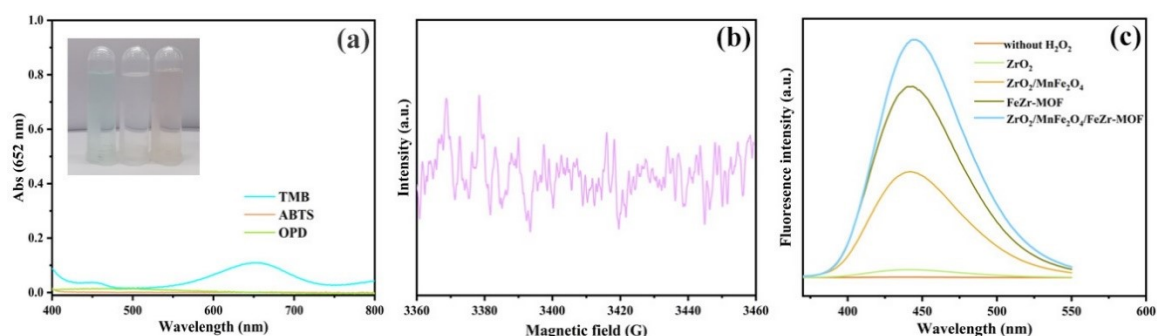

**Fig. S3.** UV-Vis spectra for the oxidation of three substrates catalyzed by ZrO<sub>2</sub>/MnFe<sub>2</sub>O<sub>4</sub>/FeZr-MOF without H<sub>2</sub>O<sub>2</sub> (a), EPR spectrum of DMPO-O<sub>2</sub><sup>•</sup> in air saturated solution (b), and the fluorescence spectra of different samples in a basic solution of TA (c).

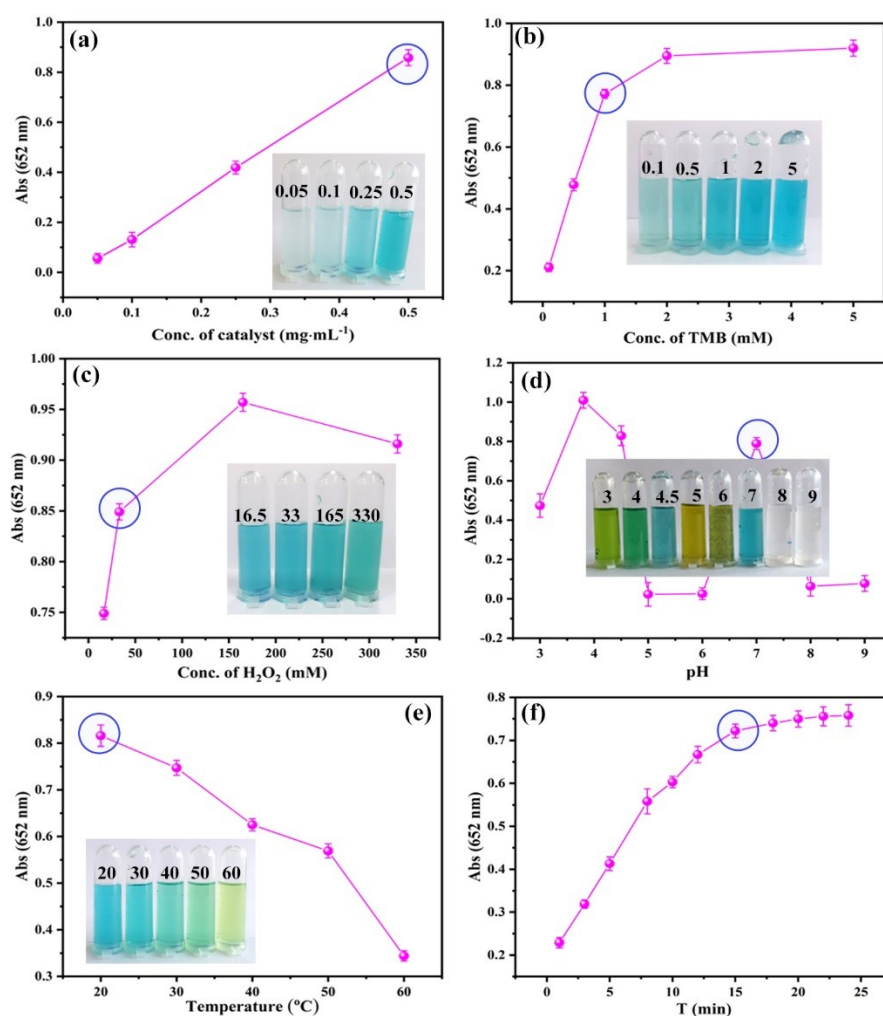

**Fig. S4.** Influence of the micromotors concentration (a), TMB concentration (b), H<sub>2</sub>O<sub>2</sub> concentration (c), pH value (d), temperature (e), and incubation time (f) on the oxidation of TMB by ZrO<sub>2</sub>/MnFe<sub>2</sub>O<sub>4</sub>/FeZr-MOF micromotors. Error bars represent the standard deviations of three replicate measurements.

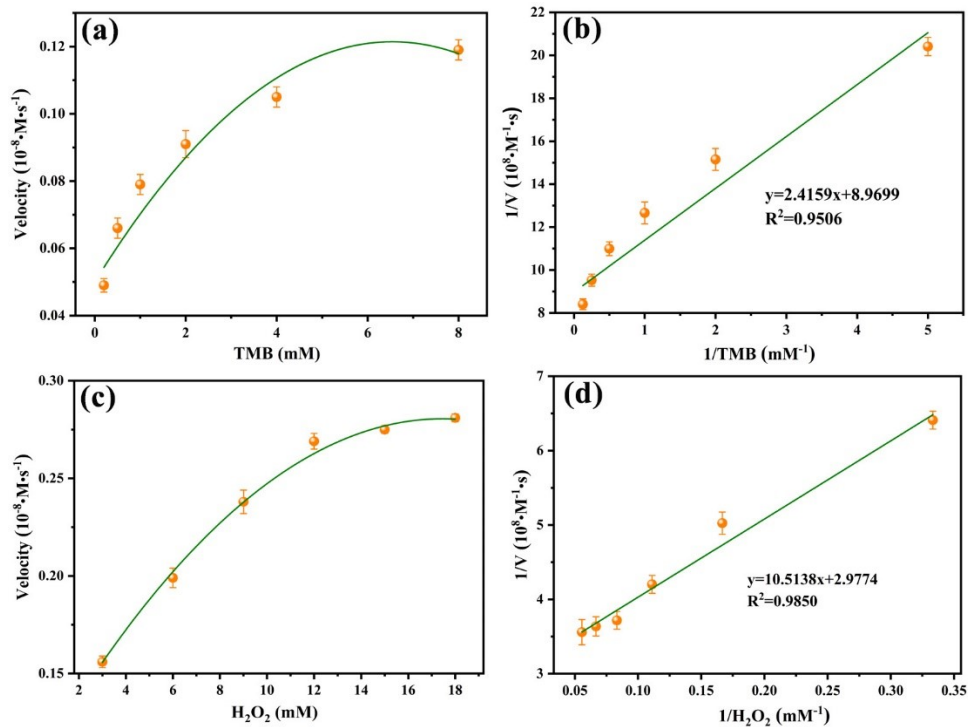

**Fig. S5.** Steady-state kinetic assay (a, c) and the corresponding double reciprocal plots (b, d) of  $\text{ZrO}_2/\text{MnFe}_2\text{O}_4/\text{FeZr-MOF}$  micromotors. Error bars represent the standard deviations of three replicate measurements.

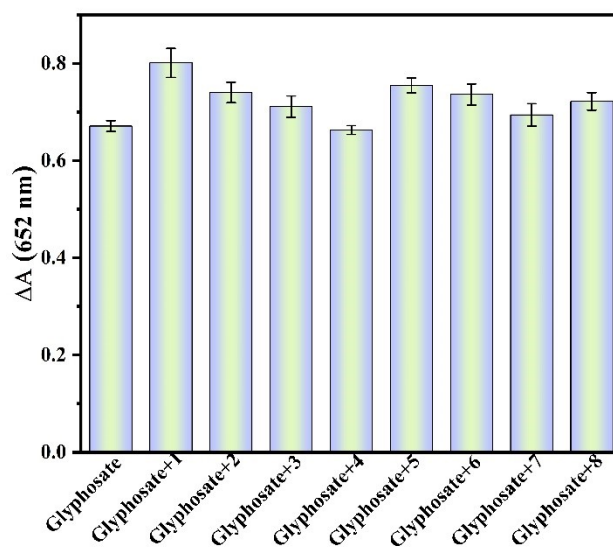

**Fig. S6.** The absorbance variation of oxTMB at 652 nm for the mixture solution of glyphosate and interfering pesticides (1: glufosinate, 2: malathion, 3: acetochlor, 4: atrazine, 5: chlorpyrifos, 6: dimethoate, 7: acetamiprid, 8: carbendazim). Error bars represent the standard deviations of three replicate measurements.

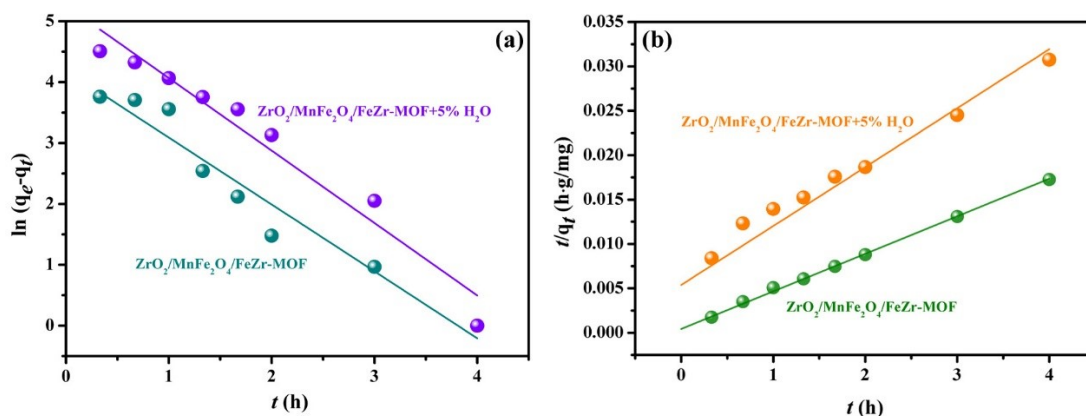

**Fig. S7.** The liner fitting curves of ZrO<sub>2</sub>/MnFe<sub>2</sub>O<sub>4</sub>/FeZr-MOF micromotors and non-motors based on pseudo-first-order kinetic model (a) and pseudo-second-order kinetic model (b).

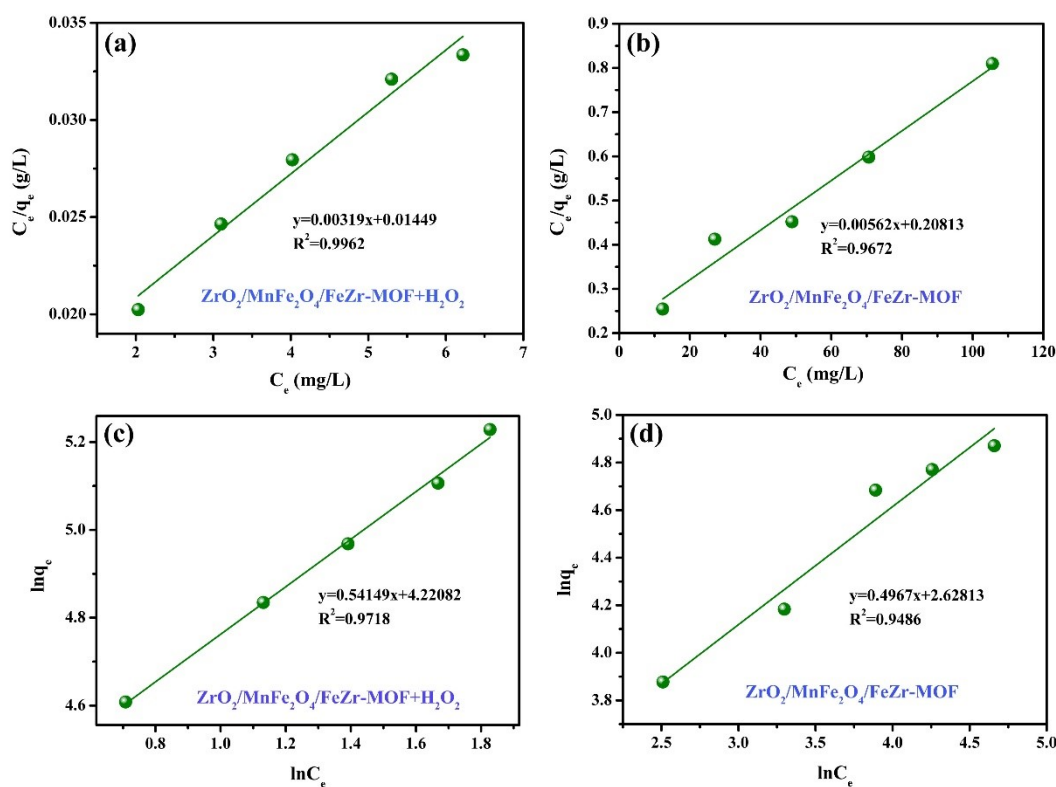

**Fig. S8.** The liner fitting charts of ZrO<sub>2</sub>/MnFe<sub>2</sub>O<sub>4</sub>/FeZr-MOF micromotors and non-motors according to Langmuir adsorption isotherm model (a, b) and Freundlich model (c, d).

**Table S1.** Motion parameters of ZrO<sub>2</sub>/MnFe<sub>2</sub>O<sub>4</sub>/FeZr-MOF in different concentrations of H<sub>2</sub>O<sub>2</sub>.

| H <sub>2</sub> O <sub>2</sub> (wt.%) | <i>L</i> (μm) | <i>a</i> (μm) | <i>U</i> (μm·s <sup>-1</sup> ) |
|--------------------------------------|---------------|---------------|--------------------------------|
| 3                                    | 42.8          | 14.1          | 62.3 (1.46 body lengths/s)     |
| 5                                    | 33.9          | 10.1          | 101.6 (3.00 body lengths/s)    |
| 10                                   | 35.2          | 12.7          | 159.8 (4.54 body lengths/s)    |

**Table S2.** Comparison of *K<sub>m</sub>* and *V<sub>max</sub>* of ZrO<sub>2</sub>/MnFe<sub>2</sub>O<sub>4</sub>/FeZr-MOF with other reported materials.

| Catalyst                                                     | <i>K<sub>m</sub></i> (mM) |                               | <i>V<sub>max</sub></i> (10 <sup>-8</sup> M·s <sup>-1</sup> ) |                               | Ref                |
|--------------------------------------------------------------|---------------------------|-------------------------------|--------------------------------------------------------------|-------------------------------|--------------------|
|                                                              | TMB                       | H <sub>2</sub> O <sub>2</sub> | TMB                                                          | H <sub>2</sub> O <sub>2</sub> |                    |
| HRP                                                          | 0.434                     | 3.7                           | 10.0                                                         | 8.71                          | Yan et al., 2007   |
| Fe <sub>3</sub> O <sub>4</sub>                               | 0.285                     | 0.238                         | 2.91                                                         | 3.21                          | Das et al., 2020   |
| [Cu(PDA)(DMF)]                                               | 0.169                     | 28.6                          | 2.19                                                         | 3.16                          | Wang et al., 2019  |
| NiCo <sub>2</sub> O <sub>4</sub> @MnO <sub>2</sub>           | 2.31                      | \                             | 127                                                          | \                             | Cui et al., 2022   |
| Pt NP@UiO-66-NH <sub>2</sub>                                 | 0.127                     | 36.5                          | 1.36                                                         | 4.15                          | Zhang et al., 2017 |
| Fe <sub>3</sub> O <sub>4</sub> @MnO <sub>2</sub> @ HKUST-1   | 0.317                     | 0.322                         | 3.07                                                         | 5.08                          | Li et al., 2023    |
| ZrO <sub>2</sub> /MnFe <sub>2</sub> O <sub>4</sub> /FeZr-MOF | 0.246                     | 3.546                         | 0.106                                                        | 0.335                         | This work          |

## References

- H. Li, H. Liu, J. Zhang, et al, Platinum nanoparticle encapsulated metal-organic frameworks for colorimetric measurement and facile removal of mercury(II), *ACS Appl. Mater. Interfaces*, 2017, **9**, 40716-40725.
- H. Luo, Y. Han, K. Hu, et al, Synthesis of dual function Fe<sub>3</sub>O<sub>4</sub>@MnO<sub>2</sub>@ HKUST-1 magnetic micromotors for efficient colorimetric detection and degradation of hydroquinone, *New J. Chem.*, 2023, **47**, 1094-1104.
- J. Wang, Y. Y. Hu, Q. Zhou, L. Z. Hu, W. S. Fu and Y. Wang, Peroxidase-like activity of metal-organic framework [Cu(PDA)(DMF)] and its application for colorimetric detection of dopamine, *ACS Appl. Mater. Interfaces*, 2019, **11**, 44466-44473.
- L. Gao, J. Zhuang, L. Nie, J. Zhang, Y. Zhang, N. Gu, T. Wang, J. Feng, D. Yang, S. Perrett, X. Yan, Intrinsic peroxidase-like activity of ferromagnetic nanoparticles, *Nat. Nanotechnol.*, 2007, **2**, 577-583.
- P. K. Boruah, M. R. Das, Dual responsive magnetic Fe<sub>3</sub>O<sub>4</sub>-TiO<sub>2</sub>/graphene nanocomposite as an artificial nanozyme for the colorimetric detection and photodegradation of pesticide in an aqueous medium, *J. Hazard. Mater.*, 2020, **385**, 17.
- Q. Xun, N. Li, S. Yang, et al., A new magnetic nanocomposite for selective detection and removal of trace copper ions from water, *J. Mater. Chem. A* 3, 2015, **3**, 1265-1271.
- W. Yang, J. Li, M. Liu, et al., Bioinspired hierarchical CoAl-LDH/MFe<sub>2</sub>O<sub>4</sub> (Ni,Zn,Co) as peroxidase mimics for colorimetric detection of glucose. *Appl. Clay Sci.*, 2019, **181**, 105238.
- Y. Dong, C. Yi, S. Yang, et al., Substrate-free graphene oxide-based micromotor for rapid adsorption of antibiotic, *Nanoscale*, 2019, **11**, 4562-4570.
- Y. Ma, M. Zhu, Q. He, M. Zhao and H. Cui, Photoenhanced Oxidase-peroxidase-like NiCo<sub>2</sub>O<sub>4</sub>@MnO<sub>2</sub> nanozymes for colorimetric detection of hydroquinone, *ACS Sustain. Chem. Eng.*, 2022, **10**, 5651- 5658.
